# Supplementary material for: BDNF Genetic Variant and Its Genotypic Fluctuation in Major Depressive Disorder
Source: Hindawi journal article supplement (doi:10.1155/2021/7117613), 2021-11-01
Supplement: f1 [file 7117613.f1.zip]

**Table S1:** Articles not selected following the PECOS strategy and the eligibility criteria.

| Author            | Title                                                                                                                                                 | Year | Exclusion Phase | Reason for exclusion        |
|-------------------|-------------------------------------------------------------------------------------------------------------------------------------------------------|------|-----------------|-----------------------------|
| Lye et al.        | Predictors of recurrence of major depressive disorder.                                                                                                | 2020 | Complete text   | Incomplete data (frequency) |
| Schosser et al.   | The Impact of BDNF Polymorphisms on Suicidality in Treatment-Resistant Major Depressive Disorder: A European Multicenter Study.                       | 2018 | Complete text   | Incomplete data (frequency) |
| Van Venzel et al. | Effect of childhood maltreatment and brain-derived neurotrophic factor on brain morphology.                                                           | 2016 | Complete text   | Incomplete data (frequency) |
| Losenkov et al.   | Association Between BDNF Gene Variant Rs6265 and the Severity of Depression in Antidepressant Treatment-Free Depressed Patients                       | 2020 | Complete text   | Incomplete data (frequency) |
| Hsieh et al.      | Abnormal Brain-Derived Neurotrophic Factor Exon IX Promoter Methylation, Protein, and mRNA Levels in Patients with Major Depressive Disorder          | 2019 | Complete text   | Incomplete data (frequency) |
| Oh et al.         | The Role of Dendritic Brain-Derived Neurotrophic Factor Transcripts on Altered Inhibitory Circuitry in Depression                                     | 2019 | Complete text   | Incomplete data (frequency) |
| Calabro et al.    | Neuroplasticity, Neurotransmission and Brain-Related Genes in Major Depression and Bipolar Disorder: Focus on Treatment Outcomes in an Asiatic Sample | 2018 | Complete text   | Incomplete data (frequency) |
| Sun et al.        | GSK-3 beta and BDNF genes may not be associated with venlafaxine treatment response in Chinese of Han ethnicity                                       | 2019 | Complete text   | Incomplete data (frequency) |

| Author             | Title                                                                                                                                                                                                   | Year | Exclusion Phase    | Reason for exclusion        |
|--------------------|---------------------------------------------------------------------------------------------------------------------------------------------------------------------------------------------------------|------|--------------------|-----------------------------|
| Schoroeter et al.  | Longitudinal multi-level biomarker analysis of BDNF in major depression and bipolar disorder.                                                                                                           | 2020 | Complete text      | Incomplete data (frequency) |
| Sun et al.         | Effects of polymorphisms of serotonin transporter promoter (5-HTTLPR) and brain derived neurotrophic factor gene (G196A rs6265) on the risk of major depressive disorder in the Chinese Han population. | 2016 | Complete text      | Incomplete data (frequency) |
| Kao et al.         | Gene-based analysis of genes related to neurotrophic pathway suggests association of BDNF and VEGFA with antidepressant treatment-response in depressed patients                                        | 2018 | Complete text      | Wrong Gene                  |
| Rahmani et al.     | The Brain-Derived Neurotrophic Factor: Missing Link Between Sleep Deprivation, Insomnia, and Depression.                                                                                                | 2020 | Complete text      | Review/Meta-analysis        |
| Ferrer et al.      | BDNF genetic variants and methylation: effects on cognition in major depressive disorder.                                                                                                               | 2019 | Title and abstract | Wrong Gene                  |
| Deflesselle et al. | The TRKB rs2289656 genetic polymorphism is associated with acute suicide attempts in depressed patients: A transversal case control study                                                               | 2018 | Title and abstract | Wrong Gene                  |
| Bondarenko et al.  | Genetic Analysis of BDNF, GNB3, MTHFR, ACE and APOE Variants in Major and Recurrent Depressive Disorders in Russia.                                                                                     | 2016 | Title and abstract | Wrong Gene                  |
| Maul et al.        | Genetics of resilience: Implications from genome-wide association studies and candidate genes of the stress response system in posttraumatic stress disorder and depression                             | 2020 | Title and abstract | Wrong Gene                  |
| Klucken et al.     | Failure to Replicate the Association Between Fractional Anisotropy and the Serotonin Transporter Gene (5-HTTLPR, rs25531)                                                                               | 2018 | Title and abstract | Wrong Gene                  |

| Author          | Title                                                                                                                                                                                                     | Year | Exclusion Phase    | Reason for exclusion |
|-----------------|-----------------------------------------------------------------------------------------------------------------------------------------------------------------------------------------------------------|------|--------------------|----------------------|
| Kautzky et al.  | Epistasis of HTR1A and BDNF risk genes alters cortical 5-HT1A receptor binding: PET results link genotype to molecular phenotype in depression.                                                           | 2019 | Title and abstract | Wrong population     |
| Amadio et al.   | BDNFVal66met polymorphism: a potential bridge between depression and thrombosis.                                                                                                                          | 2017 | Title and abstract | Wrong population     |
| Prats et al.    | Neurotrophins role in depressive symptoms and executive function performance: Association analysis of NRN1 gene and its interaction with BDNF gene in a non-clinical sample.                              | 2017 | Title and abstract | Wrong population     |
| Antypa et al.   | Clinical and genetic factors associated with suicide in mood disorder patients                                                                                                                            | 2016 | Title and abstract | Wrong population     |
| Stephani et al. | Polymorphism of the brain-derived neurotrophic factor and dynamics of the seizure threshold of electroconvulsive therapy.                                                                                 | 2017 | Title and abstract | Wrong population     |
| Osorio et al.   | Adapting to Stress: Understanding the Neurobiology of Resilience                                                                                                                                          | 2017 | Title and abstract | Wrong population     |
| Sigitova et al. | Biological hypotheses and biomarkers of bipolar disorder                                                                                                                                                  | 2017 | Title and abstract | Wrong population     |
| Maron et al.    | Biological markers of generalized anxiety disorder                                                                                                                                                        | 2017 | Title and abstract | Wrong population     |
| Wheeler et al.  | BDNF-Dependent Effects on Amygdala-Cortical Circuitry and Depression Risk in Children and Youth.                                                                                                          | 2018 | Title and abstract | Wrong population     |
| Vinberg         | Risk. Impact of having a first-degree relative with affective disorder: a 7-year follow-up study                                                                                                          | 2016 | Title and abstract | Wrong population     |
| Meyer et al.    | A genetic variant brain-derived neurotrophic factor (BDNF) polymorphism interacts with hostile parenting to predict error-related brain activity and thereby risk for internalizing disorders in children | 2018 | Title and abstract | Wrong population     |

| Author          | Title                                                                                                                                                                         | Year | Exclusion Phase    | Reason for exclusion |
|-----------------|-------------------------------------------------------------------------------------------------------------------------------------------------------------------------------|------|--------------------|----------------------|
| Udina et al.    | Glucocorticoid Receptors, Brain-Derived Neurotrophic Factor, Serotonin and Dopamine Neurotransmission are Associated with Interferon-Induced Depression.                      | 2016 | Title and abstract | Wrong population     |
| Wang et al.     | The association between BDNF Val66Met polymorphism and emotional symptoms after mild traumatic brain injury.                                                                  | 2018 | Title and abstract | Wrong population     |
| Lundwall et al. | Genetic associations with reflexive visual attention in infancy and childhood                                                                                                 | 2017 | Title and abstract | Wrong population     |
| Van Den et al.  | Hippocampal volume change following ECT is mediated by rs699947 in the promotor region of VEGF                                                                                | 2019 | Title and abstract | Wrong population     |
| Bogdan et al.   | Genetic Moderation of Stress Effects on Corticolimbic Circuitry                                                                                                               | 2016 | Title and abstract | Wrong population     |
| Notaras et al.  | Neurobiology of BDNF in fear memory, sensitivity to stress, and stress-related disorders.                                                                                     | 2020 | Title and abstract | Review/Meta-analysis |
| Dincheva et al. | The Role of BDNF in the Development of Fear Learning.                                                                                                                         | 2016 | Title and abstract | Review/Meta-analysis |
| Douglas et al.  | High-resolution chromosome ideogram representation of recognized genes for bipolar disorder.                                                                                  | 2016 | Title and abstract | Review/Meta-analysis |
| Badamasi et al. | Genetic endophenotypes for insomnia of major depressive disorder and treatment-induced insomnia.                                                                              | 2019 | Title and abstract | Review/Meta-analysis |
| Hoppen et al.   | Childhood adversity as a transdiagnostic risk factor for affective disorders in adulthood: A systematic review focusing on biopsychosocial moderating and mediating variables | 2018 | Title and abstract | Review/Meta-analysis |
| Pereira et al.  | Imaging genetics paradigms in depression research: Systematic review and meta-analysis                                                                                        | 2018 | Title and abstract | Review/Meta-analysis |
| Amare et al.    | Pharmacogenomics in the treatment of mood disorders: Strategies and Opportunities for personalized psychiatry                                                                 | 2017 | Title and abstract | Review/Meta-analysis |

| Author            | Title                                                                                                                                                           | Year | Exclusion Phase    | Reason for exclusion |
|-------------------|-----------------------------------------------------------------------------------------------------------------------------------------------------------------|------|--------------------|----------------------|
| Fabbri et al.     | Consensus paper of the WFSBP Task Force on Genetics: Genetics, epigenetics and gene expression markers of major depressive disorder and antidepressant response | 2017 | Title and abstract | Review/Meta-analysis |
| Zhang et al.      | Neuroimaging genomic studies in major depressive disorder: A systematic review                                                                                  | 2018 | Title and abstract | Review/Meta-analysis |
| Gottschalk et al. | Genetics of generalized anxiety disorder and related traits                                                                                                     | 2017 | Title and abstract | Review/Meta-analysis |
| Davydova et al.   | Genetic basis of depressive disorders                                                                                                                           | 2019 | Title and abstract | Review/Meta-analysis |
| Savage et al.     | The Genetics of Anxiety-Related Negative Valence System Traits                                                                                                  | 2017 | Title and abstract | Review/Meta-analysis |
| Pereira et al.    | The relationship between genetic risk variants with brain structure and function in bipolar disorder: A systematic review of genetic-neuroimaging studies       | 2017 | Title and abstract | Review/Meta-analysis |
| Smeeth et al.     | Polygenic risk for circulating reproductive hormone levels and their influence on hippocampal volume and depression susceptibility                              | 2019 | Title and abstract | Review/Meta-analysis |
| Gonda et al.      | Genetic variants in major depressive disorder: From pathophysiology to therapy.                                                                                 | 2019 | Title and abstract | Review/Meta-analysis |
| Busch e Menke     | Blood-based biomarkers predicting response to antidepressants                                                                                                   | 2019 | Title and abstract | Review/Meta-analysis |
| Hing et al.       | A comprehensive review of genetic and epigenetic mechanisms that regulate BDNF expression and function with relevance to major depressive disorder.             | 2018 | Title and abstract | Review/Meta-analysis |
