# Supplementary material for: BDNF Genetic Variant and Its Genotypic Fluctuation in Major Depressive Disorder
Source: Hindawi journal article supplement (doi:10.1155/2021/7117613), 2021-11-01
Supplement: f1 [file 7117613.f1.zip]

**Table S2:** Quality Evaluation of articles according to the adapted GRIPS guideline

[illegible]

| Section/Topic                        | Peters et al. [17]                                                                                                                                                                                                | Brunoni et al. [18] | Aldoghachi et al. [19] | Froud et al. [20] | Ai et al. [21] | Kitzkerová et al. [22] | Bassi et al. [24] | Youssef et al. [15] | Caldieraro et al. [25] | Wang et al. [26] | Han et al. [27] | Su et al. [10] | Tatham et al. [28] | Tatham et al. [16] | Jaworska et al. [29] | Kostic et al. [30] | Cao et al. [31] |
|--------------------------------------|-------------------------------------------------------------------------------------------------------------------------------------------------------------------------------------------------------------------|---------------------|------------------------|-------------------|----------------|------------------------|-------------------|---------------------|------------------------|------------------|-----------------|----------------|--------------------|--------------------|----------------------|--------------------|-----------------|
| <b>Results</b>                       |                                                                                                                                                                                                                   |                     |                        |                   |                |                        |                   |                     |                        |                  |                 |                |                    |                    |                      |                    |                 |
| <b>Participants</b>                  | 14) Report the numbers of individuals at each stage of the study. Give reasons for nonparticipation at each stage. Report the number of participants not genotyped, and reasons why they were not genotyped.      | x                   | x                      | x                 |                | x                      |                   | x                   | x                      | x                | x               |                |                    | x                  | x                    | x                  | x               |
| <b>Descriptives: Population</b>      | 15) Report demographic and clinical characteristics of the study population, including risk factors used in the risk modeling.                                                                                    | x                   | x                      | x                 | x              | x                      | x                 | x                   | x                      | x                | x               | x              | x                  | x                  | x                    | x                  | x               |
| <b>Descriptives: Model estimates</b> | 16) Report unadjusted associations between the variables in the risk model(s) and the outcome. Report adjusted estimates and their precision from the full risk model(s) for each variable.                       |                     |                        | x                 | x              | x                      |                   |                     | x                      | x                | x               | x              | x                  | x                  | x                    | x                  | x               |
| <b>Risk distributions</b>            | 17) Descriptives: Model estimates                                                                                                                                                                                 | x                   | x                      | x                 | x              | x                      | x                 | x                   | x                      | x                | x               | x              | x                  | x                  | x                    | x                  | x               |
| <b>Assessment</b>                    | 18) Report measures of model fit and predictive ability, and any other performance measures, if pertinent.                                                                                                        |                     |                        | x                 |                | x                      |                   | x                   | x                      | x                | x               |                | x                  | x                  | x                    | x                  | x               |
| <b>Validation</b>                    | 19) Report any validation of the risk model(s).                                                                                                                                                                   |                     |                        |                   |                | x                      |                   |                     |                        |                  |                 | x              |                    | x                  | x                    | x                  | x               |
| <b>Other analyses</b>                | 20) Present results of any subgroup, interaction, or exploratory analyses, whenever pertinent.                                                                                                                    | x                   | x                      | x                 | x              | x                      | x                 | x                   | x                      | x                | x               | x              | x                  | x                  | x                    | x                  | x               |
| <b>Discussion</b>                    |                                                                                                                                                                                                                   |                     |                        |                   |                |                        |                   |                     |                        |                  |                 |                |                    |                    |                      |                    |                 |
| <b>Limitations</b>                   | 21) Discuss limitations and assumptions of the study, particularly those concerning study design, selection of participants, and measurements and analyses, and discuss their impact on the results of the study. |                     | x                      | x                 | x              | x                      |                   | x                   | x                      | x                | x               |                | x                  | x                  | x                    | x                  | x               |
| <b>Interpretation</b>                | 22) Give an overall interpretation of results considering objectives, limitations, multiplicity of analyses, results from similar studies, and other relevant evidence.                                           | x                   | x                      | x                 | x              | x                      | x                 | x                   | x                      | x                | x               | x              | x                  | x                  | x                    | x                  | x               |
| <b>Generalizability</b>              | 23) Discuss the generalizability and, if pertinent, the health care relevance of the study results.                                                                                                               | x                   | x                      | x                 | x              | x                      |                   | x                   | x                      | x                |                 | x              | x                  | x                  | x                    | x                  | x               |

X = Present.
