# Supplementary material for: BDNF Genetic Variant and Its Genotypic Fluctuation in Major Depressive Disorder
Source: Behav Neurol. 2021 Nov 1;2021:7117613. doi: 10.1155/2021/7117613 (PMC8575598; doi:10.1155/2021/7117613)
Supplement: Supplementary Materials — Table S1: articles not selected following the PECOS strategy and the eligibility criteria. Table S2: evaluation of the articles' quality, according to the adapted GRIPS guideline. [file 7117613.f1.zip]

Archive with 2 entries (2 files):
- Table S1 - BDNF genetic variant and MDD.pdf
- Table S2 - BDNF genetic variant and MDD.pdf
